# Supplementary material
Source: publisher figshare collection journal article supplement (https://frontiersin.figshare.com/ndownloader/files/31134319)
Supplement: Supplementary file [file 31134319]

(a) Cancer: COAD

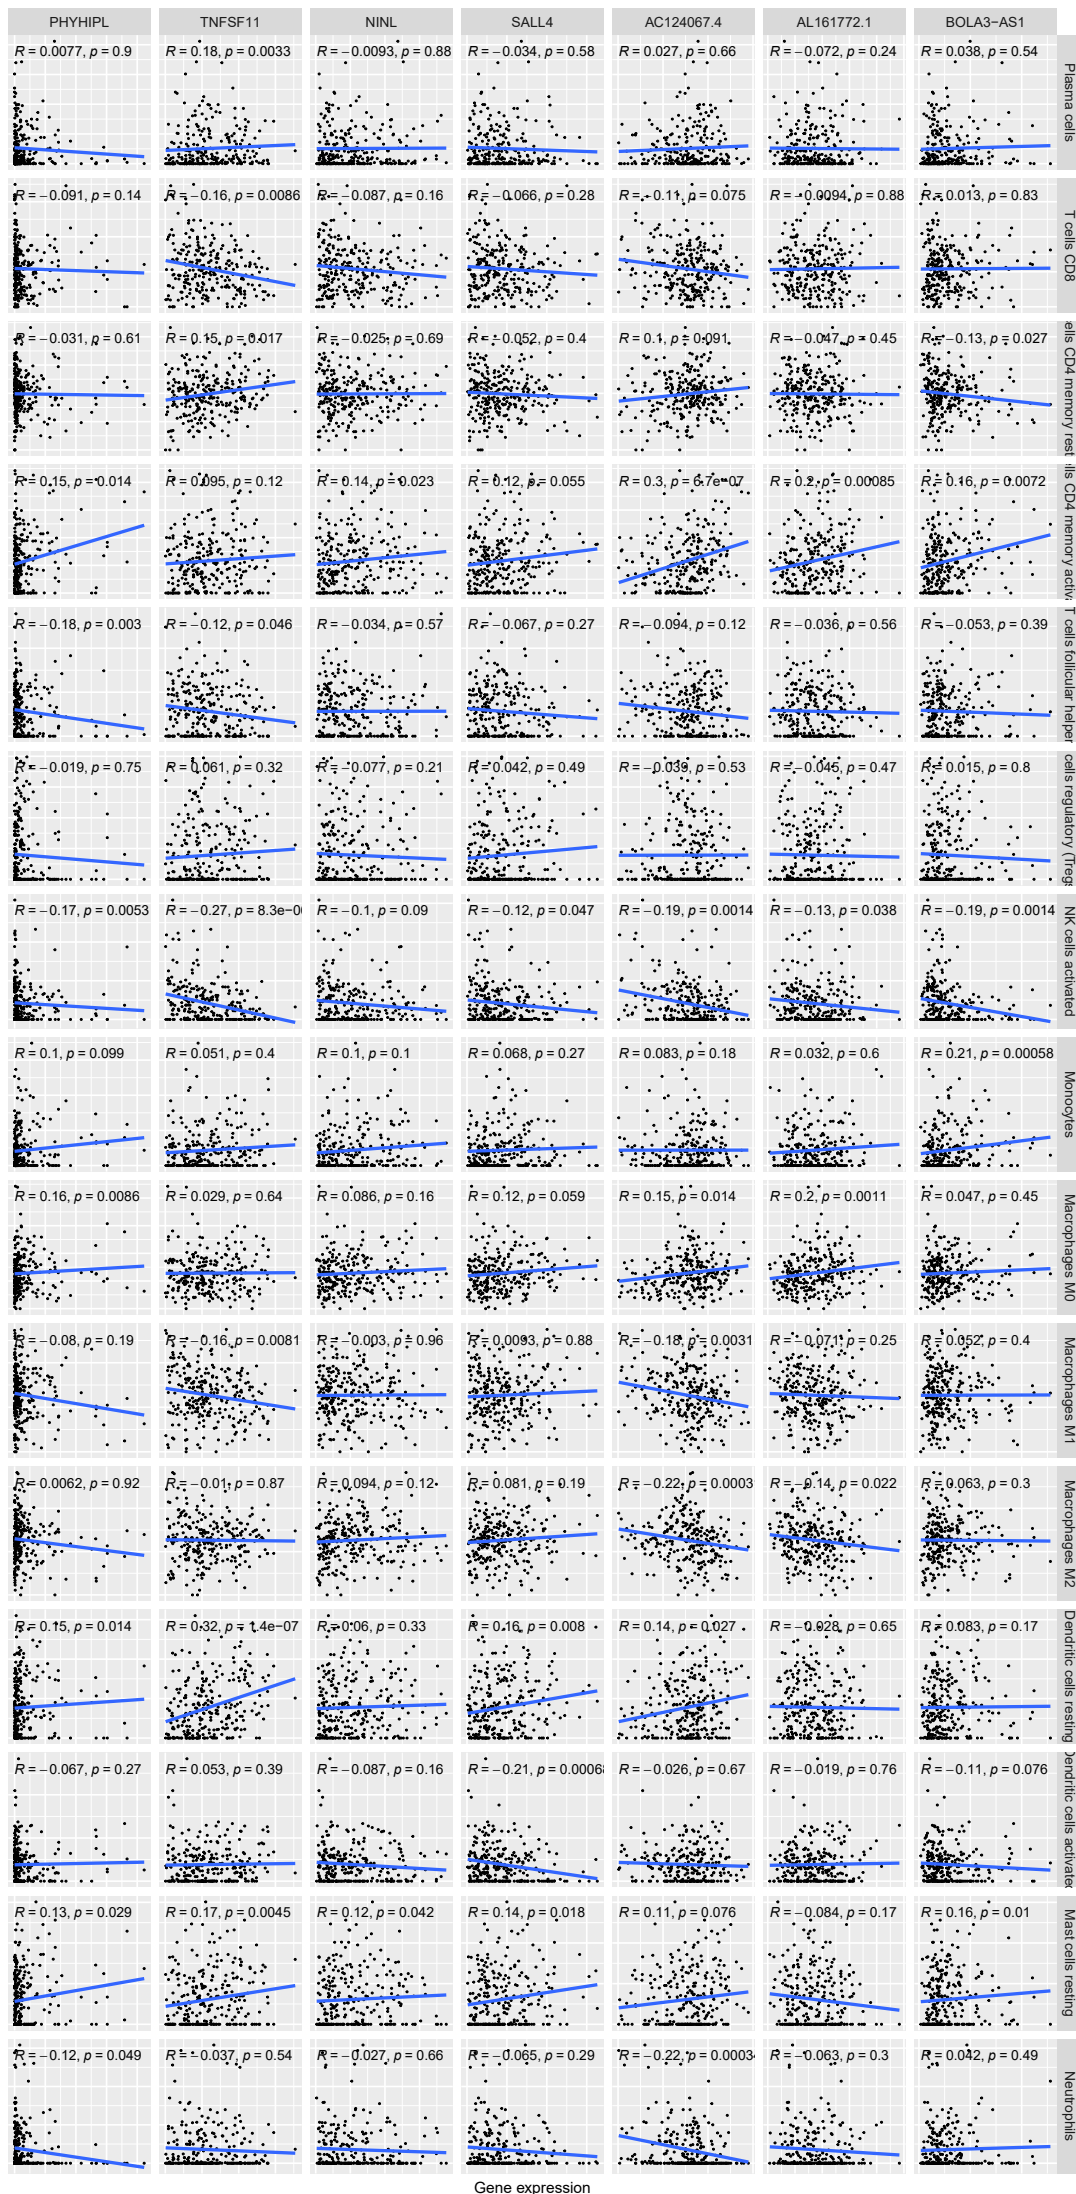

Gene expression
